# Supplementary material for: Room-temperature ABX3-typed molecular ferroelectric: [C5H9–NH3][CdCl3]
Source: Royal Society of Chemistry journal article supplement (doi:10.1039/c3qi00058c), 2014-01-01
Supplement: c3qi00058c.pdf [file c3qi00058c.pdf]

## Supporting Information

### Room-temperature ABX<sub>3</sub>-typed Molecular

### Ferroelectric:[C<sub>5</sub>H<sub>9</sub>-NH<sub>3</sub>]<sub>2</sub>CdCl<sub>3</sub>

Yi Zhang, Heng-Yun Ye, Wen Zhang and Ren-Gen Xiong\*

Ordered Matter Science Research Center, Southeast University, Nanjing, 211189,  
PRC

\* email: [xionrg@seu.edu.cn](mailto:xionrg@seu.edu.cn).

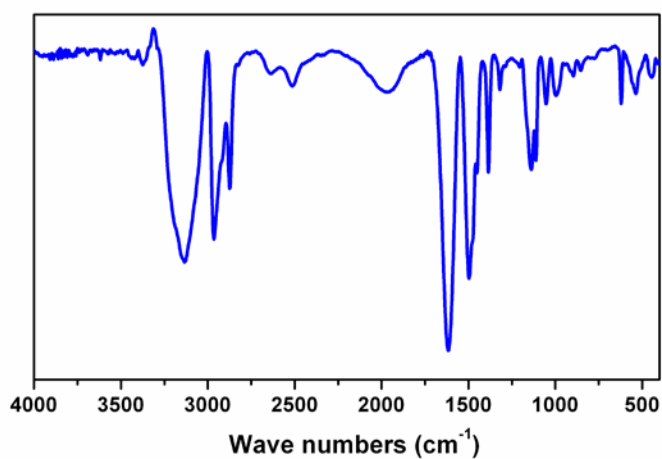

**Fig. S1** IR spectrum of **1** indicating there is strong peak of R-NH<sub>3</sub><sup>+</sup> group at about 3200cm<sup>-1</sup>.

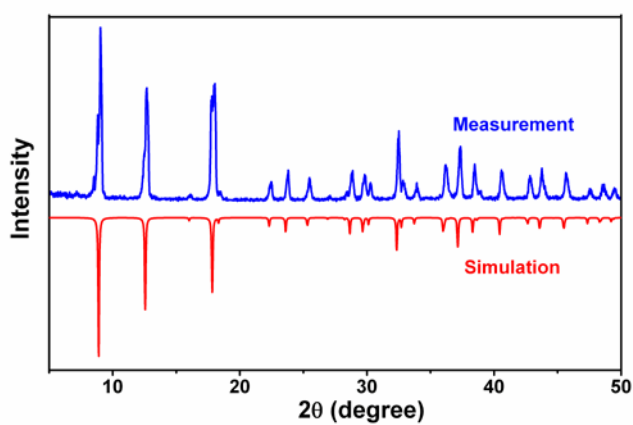

**Fig. S2** The matching status of XRD diffraction pattern of bulk sample and single crystal of **1**, showing that the sample we obtained is pure.

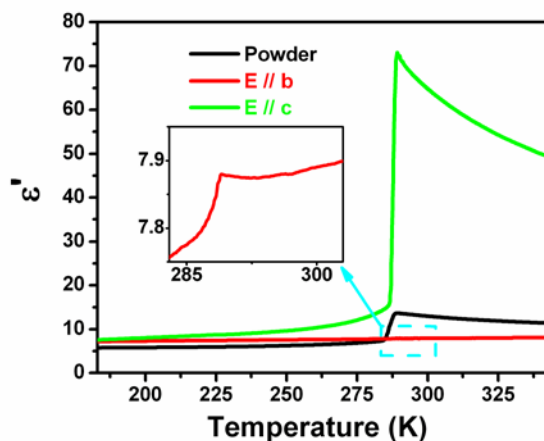

**Fig. S3** The temperature-dependent dielectric constants measured along *b*- and *c*-axis as well as powdered mode.

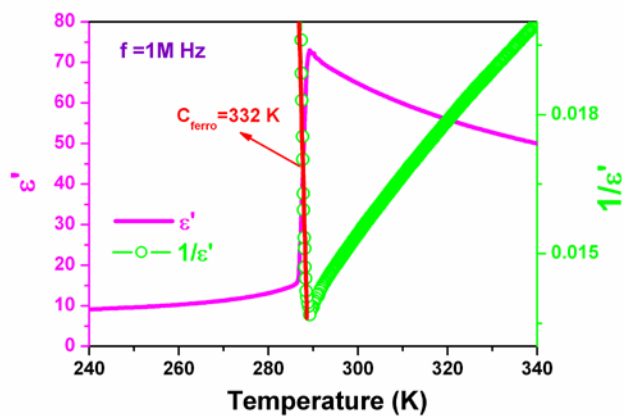

**Fig. S4** The reciprocal dielectric susceptibility ( $\epsilon'$ ) as a function of temperature showing that below  $T_c$  it is linear and above  $T_c$  in very narrow range is also linear.

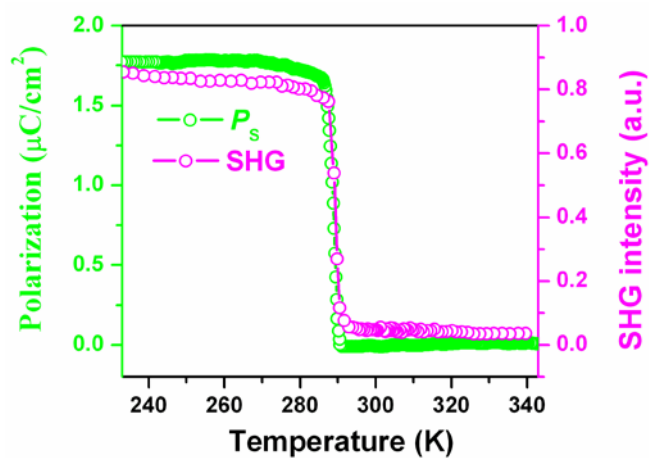

**Fig. S5** The normalization of the temperature-dependent  $P_s$  and SHG effect, showing that they are almost overlapped.
